# Supplementary material for: Cystathionine γ-lyase and hydrogen sulfide modulates glucose transporter Glut1 expression via NF-κB and PI3k/Akt in macrophages during inflammation
Source: PubMed Central journal article supplement (PMC9754168; doi:10.1371/journal.pone.0278910), 2022-12-15
Supplement: pone.0278910.s001.pdf [file pone.0278910.s001.pdf]

# Uncropped Western images

## **Cystathionine $\gamma$ -lyase and hydrogen sulfide modulates glucose transporter Glut1 expression via NF- $\kappa$ B and PI3k/Akt in macrophages during inflammation**

Alex Cornwell<sup>1</sup>, Samantha Fedotova<sup>2</sup>, Sara Cowan<sup>2</sup>, and Alireza Badiei<sup>2\*</sup>

---

<sup>1</sup> Department of Biology and Wildlife, College of Natural Science and Mathematics, University of Alaska Fairbanks, AK, USA.

<sup>2</sup> Department of Veterinary Medicine, College of Natural Science and Mathematics, University of Alaska Fairbanks, AK, USA.

\* Correspondence: [abadiei@alaska.edu](mailto:abadiei@alaska.edu)

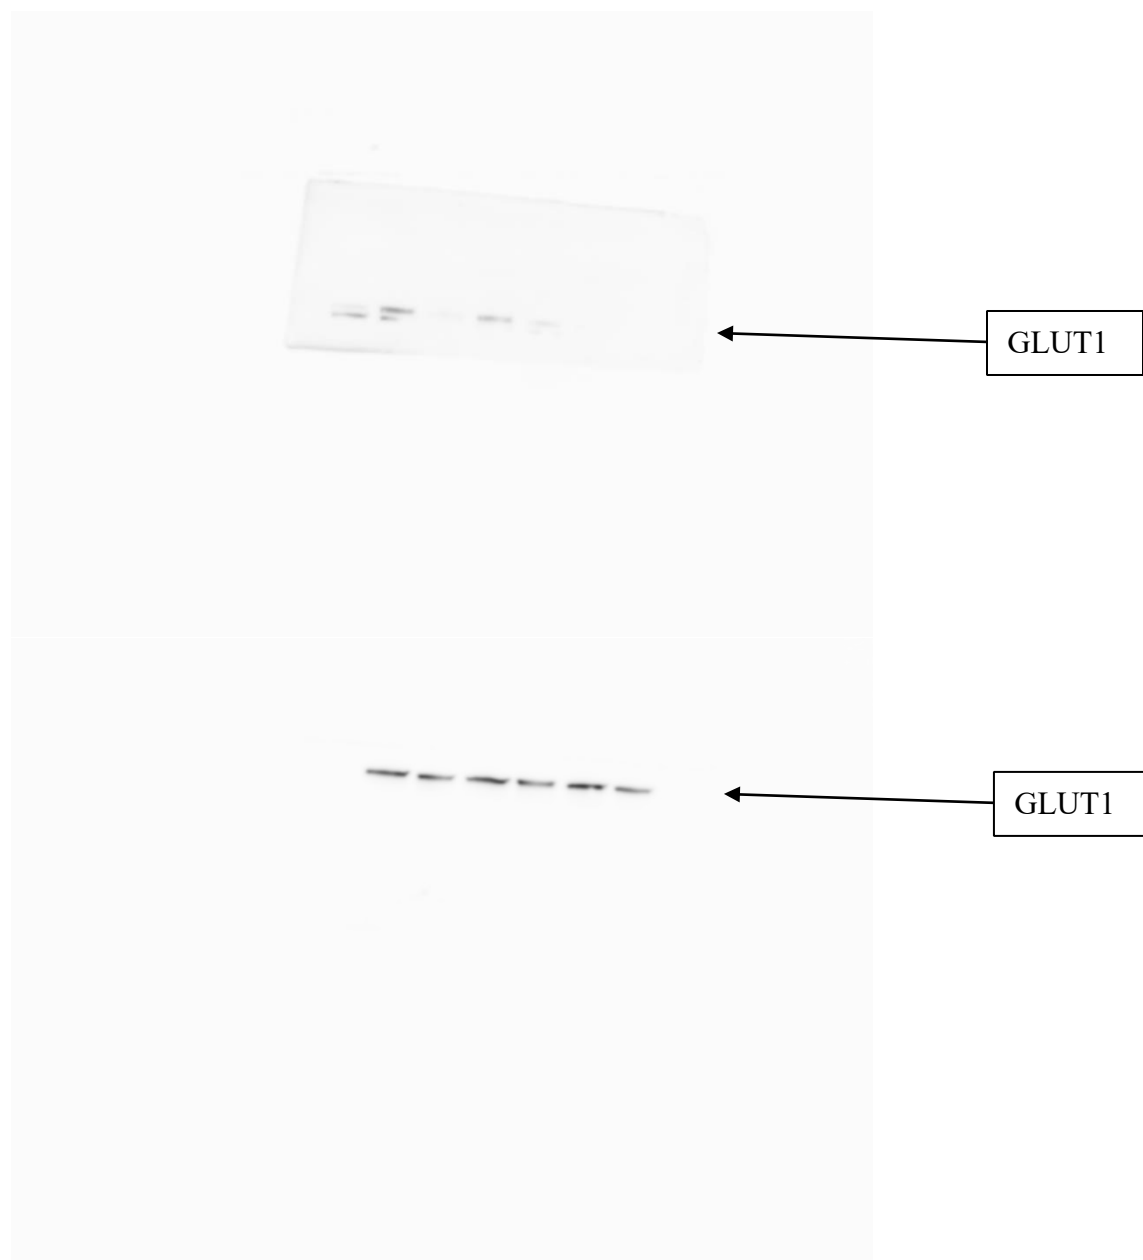

**Figure B1.** Left to right: Control, LPS, siRNA-CSE, siRNA-CSE+LPS, GY4137 (0.1mM), and GY4137 (0.5mM). Underlined samples were not used in final analysis.

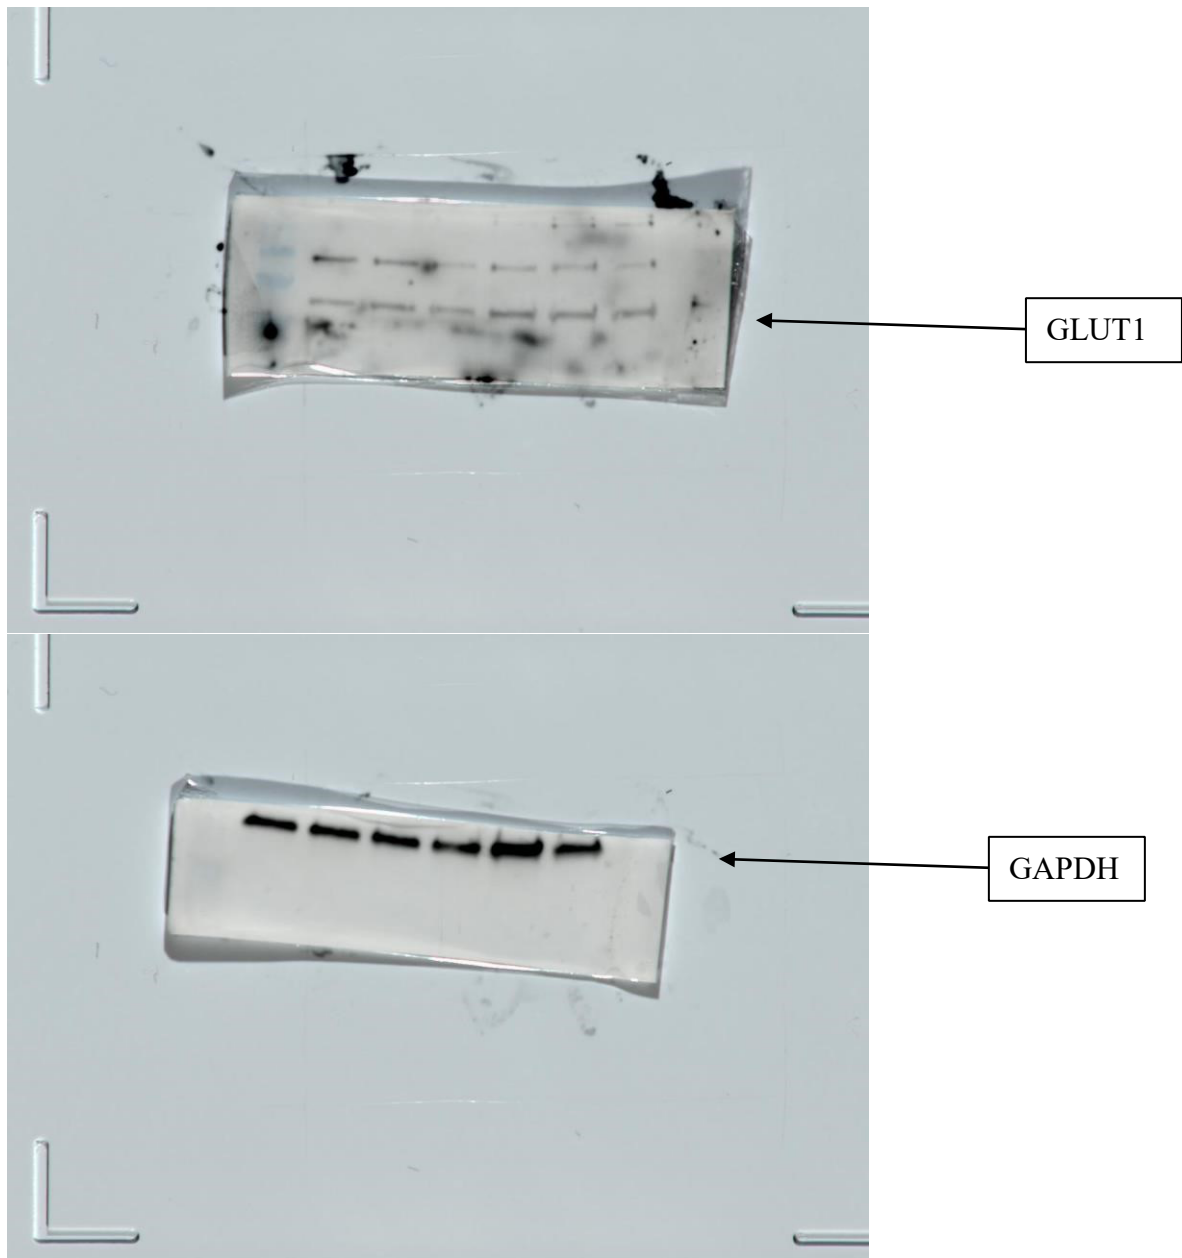

**Figure B2.** Left to right: Control, LPS, siRNA-CSE+LPS, siRNA-Scramble+LPS, GYY4137 (0.5mM)+LPS, and GYY4137 (0.1mM)+LPS.

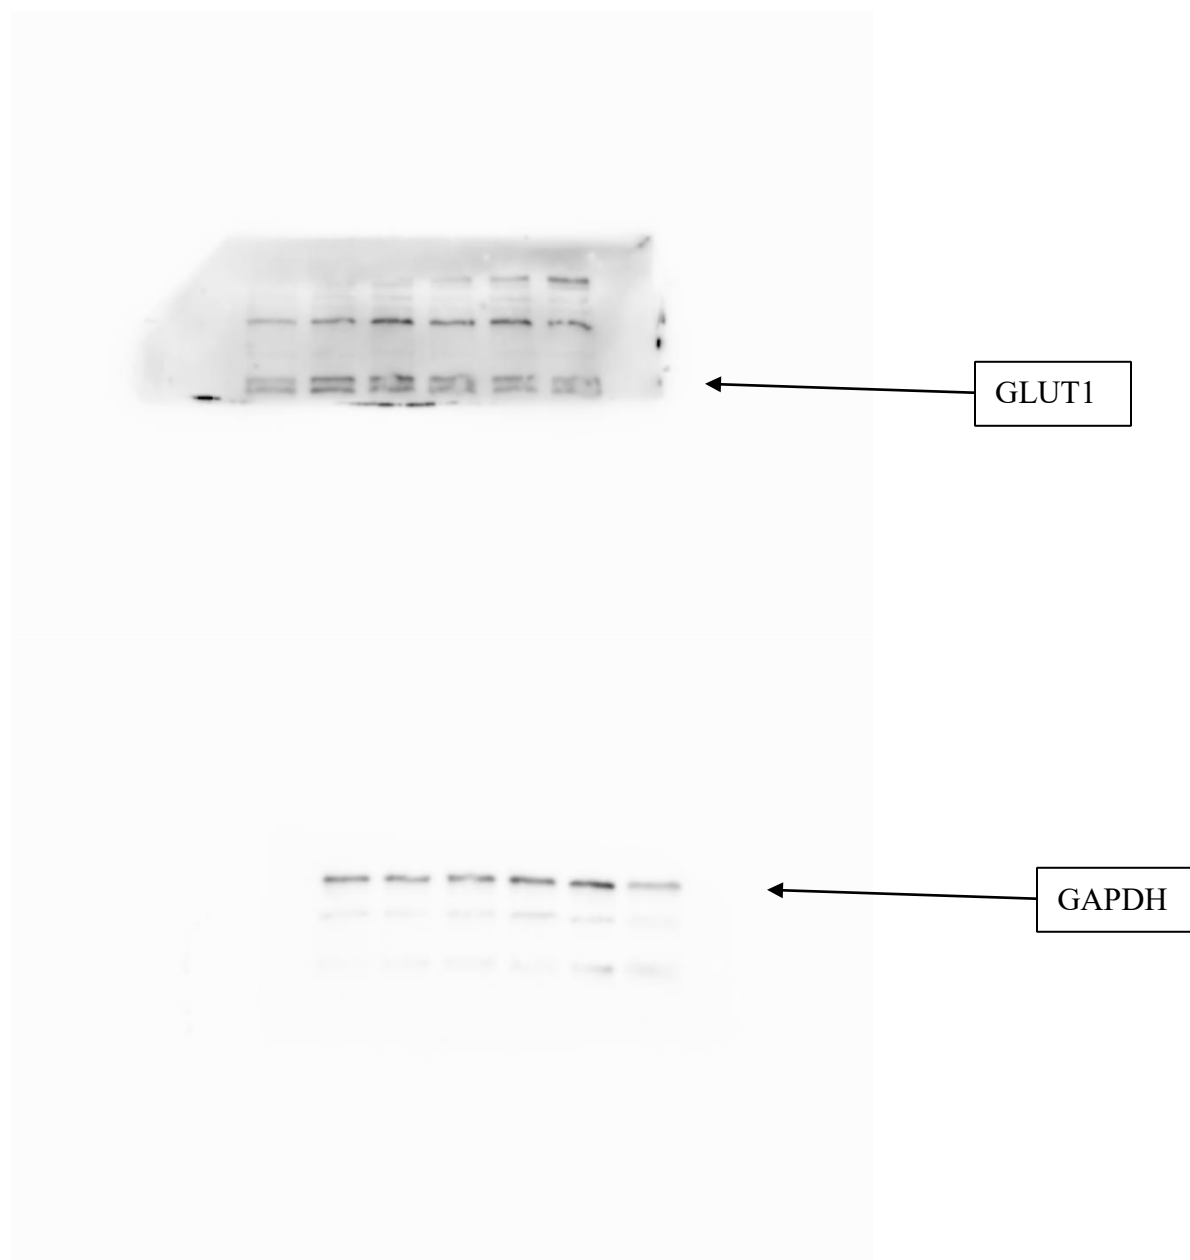

**Figure B3.** Left to right: Control, LPS, GYY4137 (0.1mM)+LPS, and GYY4137 (0.5mM)+LPS, siRNA-CSE+LPS, siRNA-Scramble+LPS

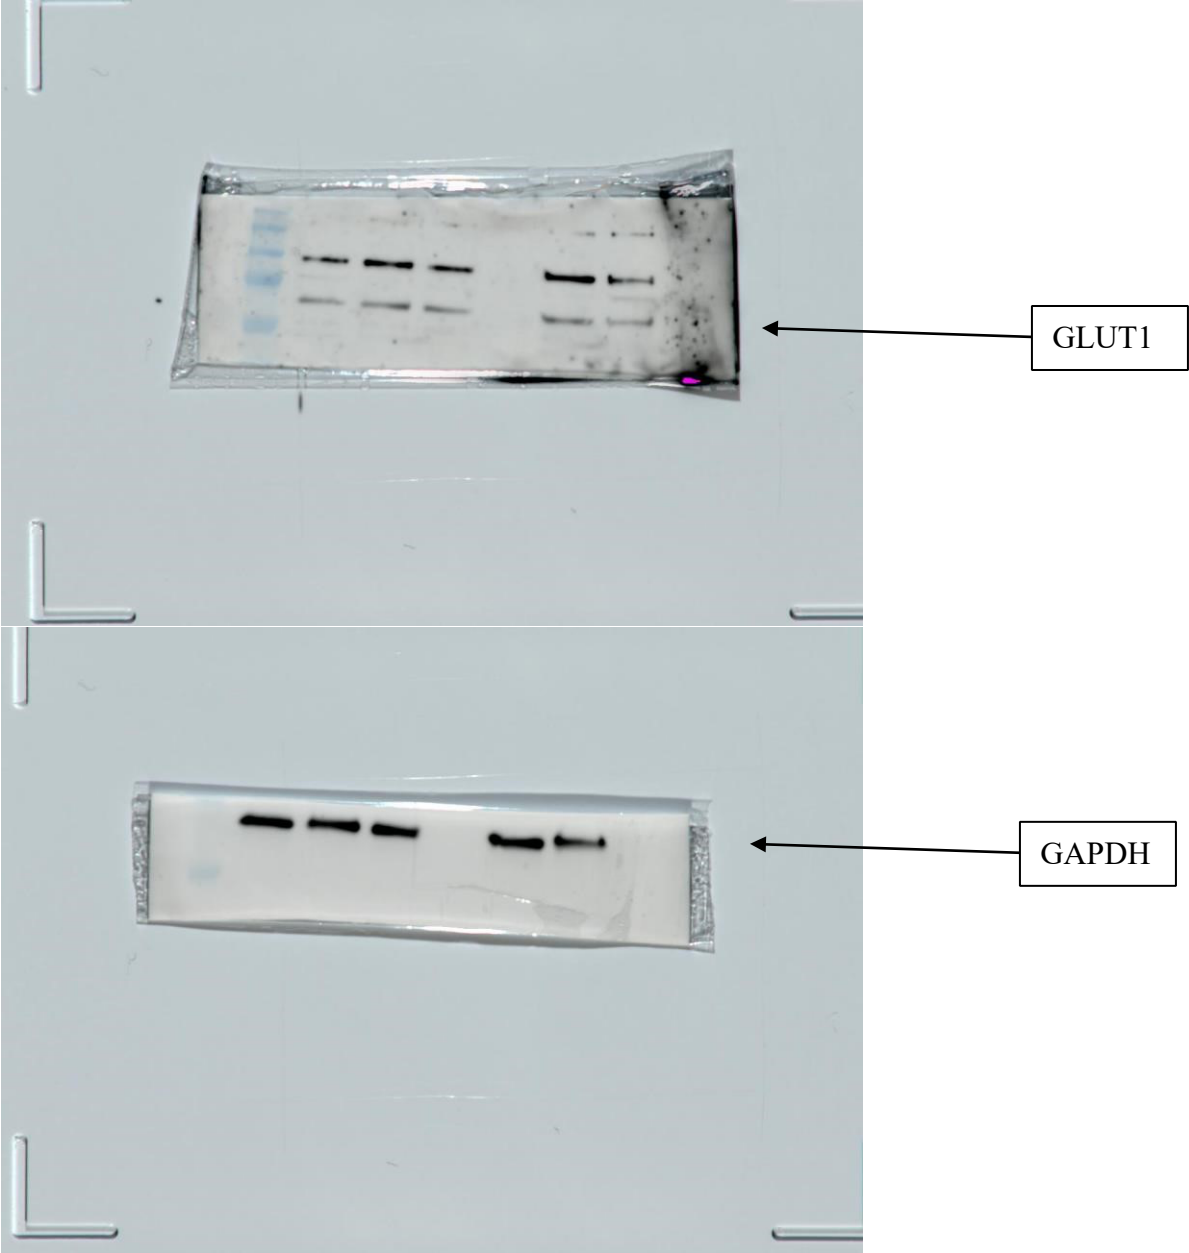

**Figure B4.** Left to right: Control, LPS, siRNA-CSE+LPS, siRNA-Scramble+LPS, and GYY4137 (0.5mM)+LPS.

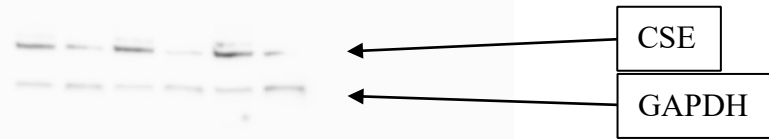

**Figure B5.** Left to right: siRNA-scramble+LPS, siRNA-CSE+LPS, siRNA-scramble+LPS, siRNA-CSE+LPS, siRNA-scramble+LPS, siRNA-CSE+LPS.

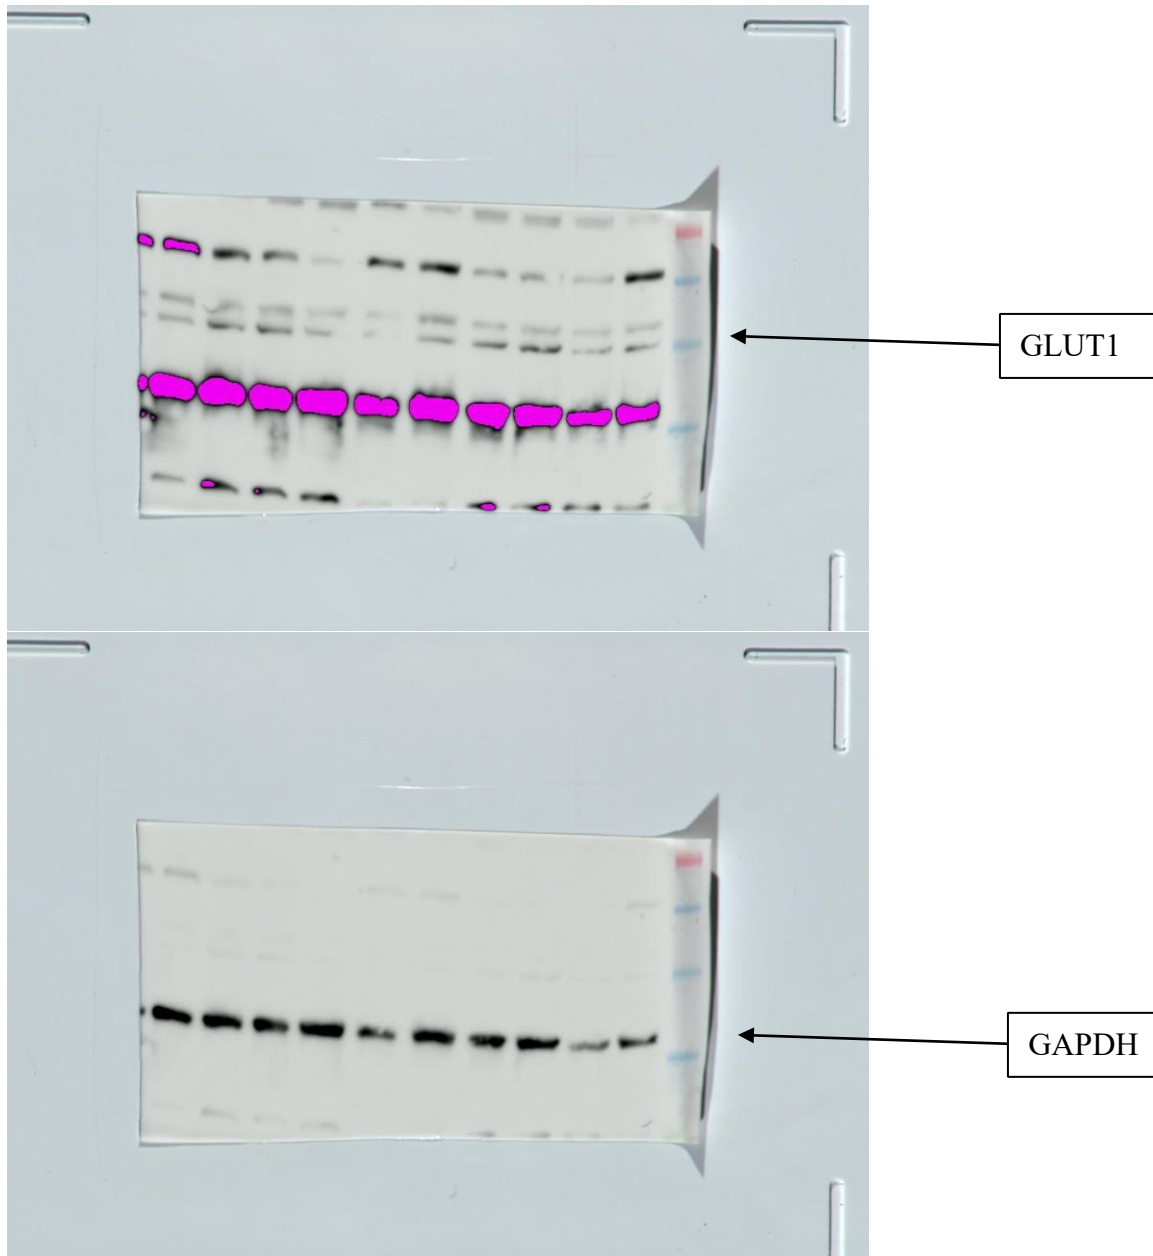

**Figure B6.** Left to right: Control, LPS, LPS, siRNA-CSE, siRNA-CSE, siRNA-CSE+LPS, siRNA-CSE+LPS, GYY4137 (0.1mM)+LPS, GYY4137 (0.1mM)+LPS, siRNA Scramble+LPS. Underlined samples were not used in final analysis.
