# Supplementary material for: Cystathionine γ-lyase and hydrogen sulfide modulates glucose transporter Glut1 expression via NF-κB and PI3k/Akt in macrophages during inflammation
Source: PubMed Central journal article supplement (PMC9754168; doi:10.1371/journal.pone.0278910), 2022-12-15
Supplement: pone.0278910.s002.pdf [file pone.0278910.s002.pdf]

# Supplementary information

## **Cystathionine $\gamma$ -lyase and hydrogen sulfide modulates glucose transporter Glut1 expression via NF- $\kappa$ B and PI3k/Akt in macrophages during inflammation**

Alex Cornwell<sup>1</sup>, Samantha Fedotova<sup>2</sup>, Sara Cowan<sup>2</sup>, and Alireza Badiei<sup>2,\*</sup>

<sup>1</sup> Department of Biology and Wildlife, College of Natural Science and Mathematics, University of Alaska Fairbanks, AK, USA.

<sup>2</sup> Department of Veterinary Medicine, College of Natural Science and Mathematics, University of Alaska Fairbanks, AK, USA.

\* Correspondence: [abadiei@alaska.edu](mailto:abadiei@alaska.edu)

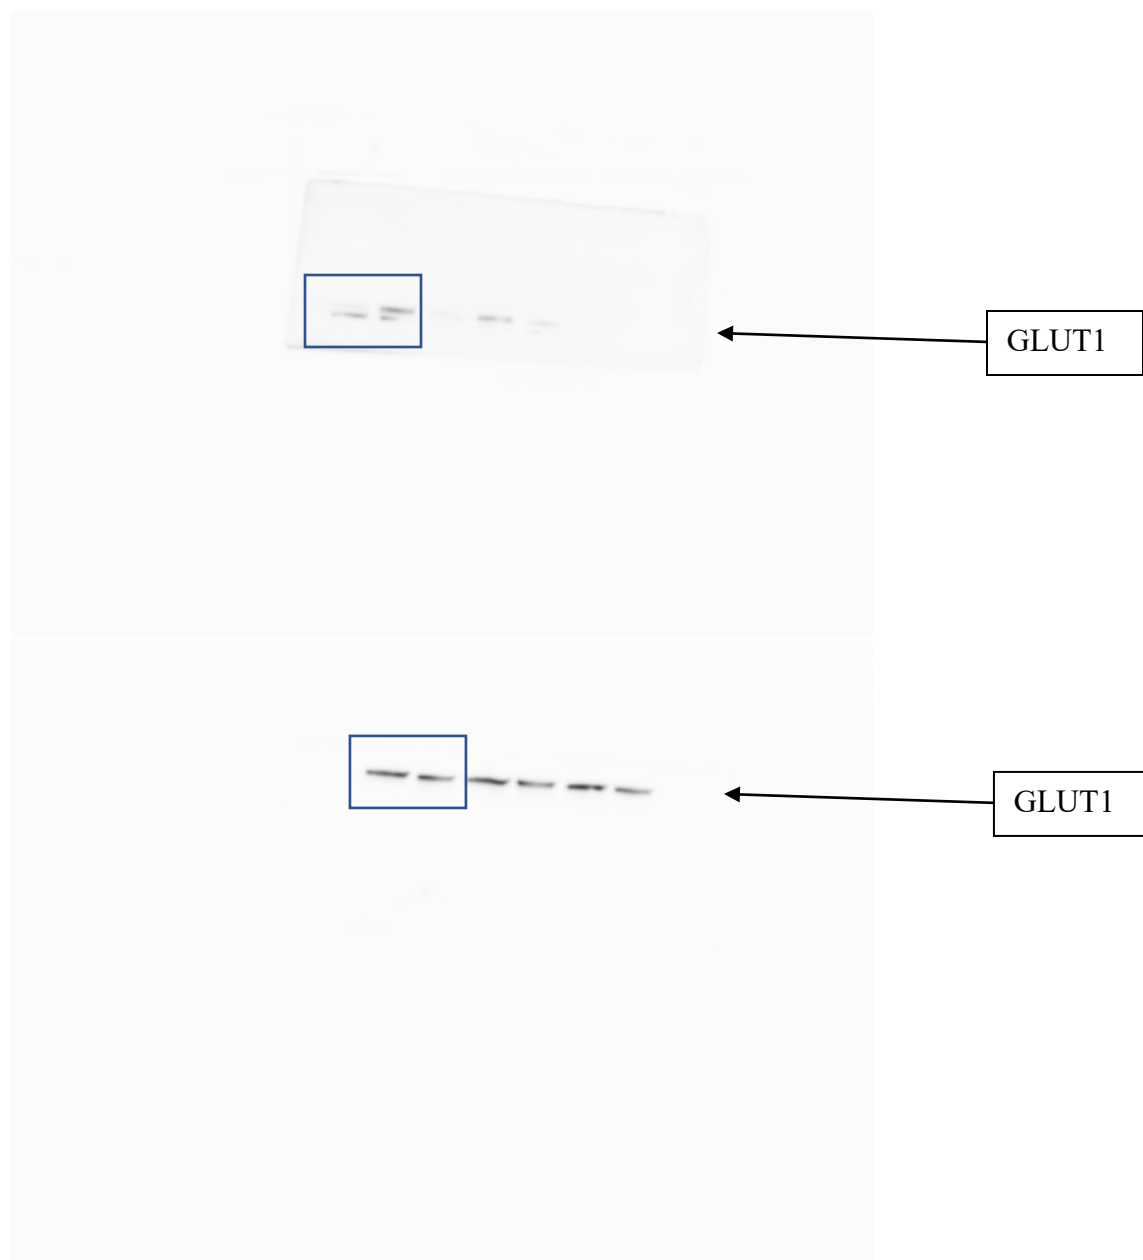

**Figure S1.** LPS induces Glut1 expression in macrophages. Figure 1b was cropped from the above image.

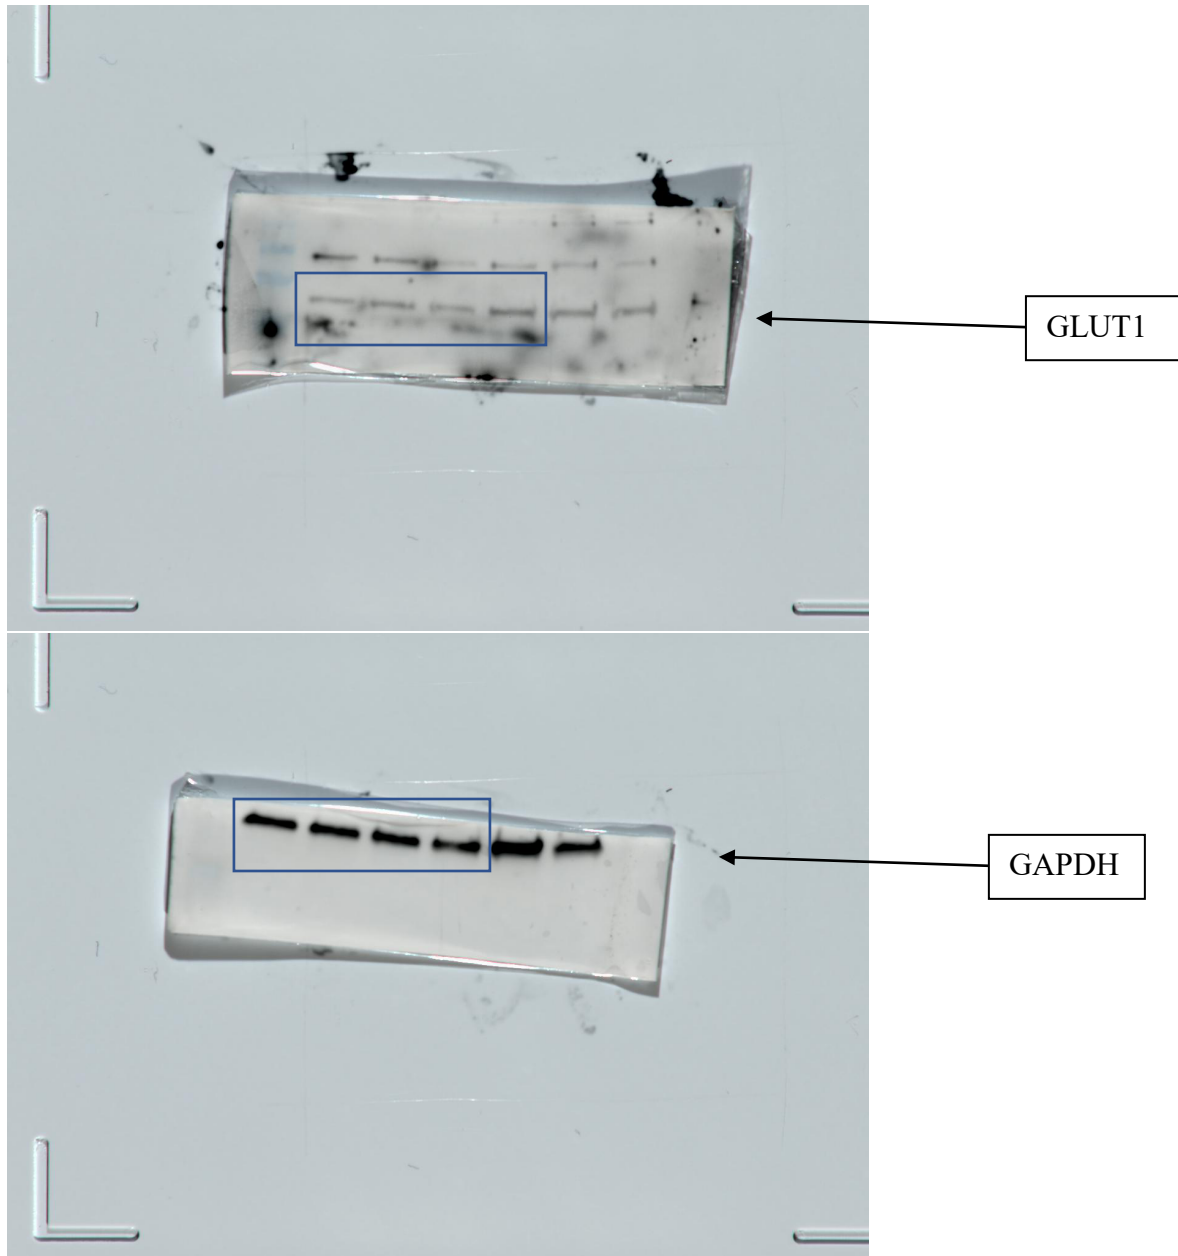

**Figure S2.** LPS stimulated macrophages genetically silenced of CSE gene to inhibit CSE expression decreased Glut1 expression compared to scramble siRNA control. Figure 3b was cropped from the above image.

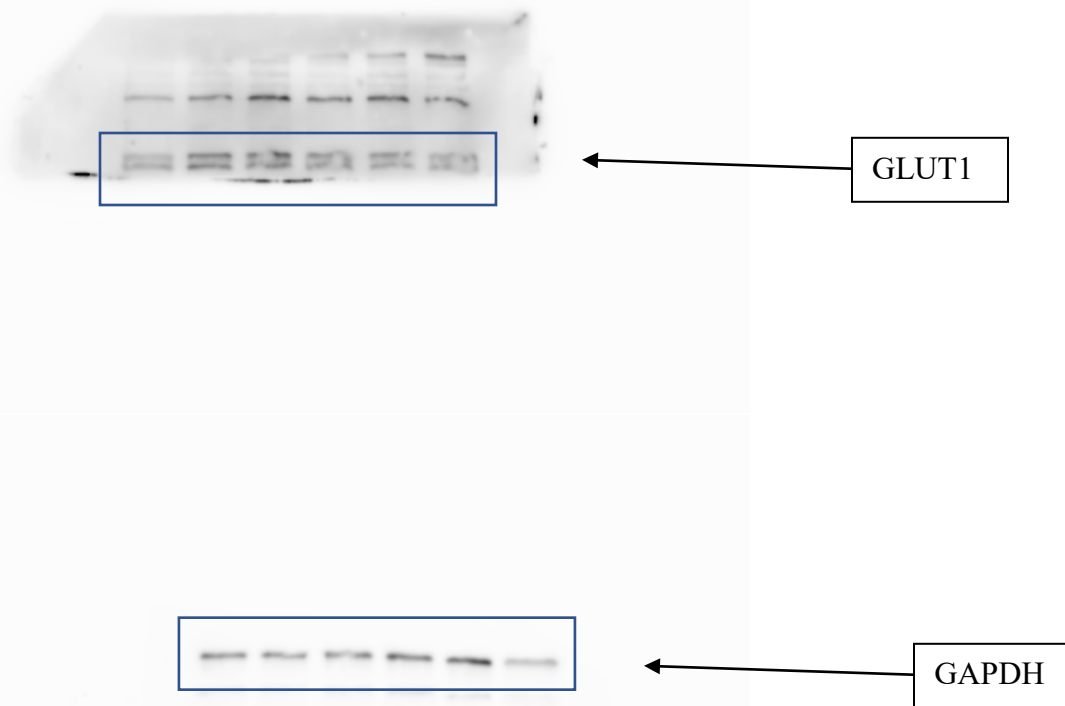

**Figure S3.** H<sub>2</sub>S modulates LPS-induced NF- $\kappa$ B and Akt activation and decreases LPS-induced Glut1 expression. Figure 4e was cropped from the above image.

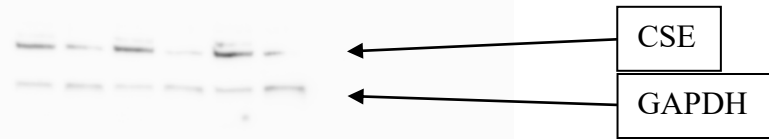

**Figure S6.** siRNA targeting CSE decreased CSE protein level in LPS-treated RAW264.7 cells. Left to right: siRNA-scramble+LPS, siRNA-CSE+LPS, siRNA-scramble+LPS, siRNA-CSE+LPS, siRNA-scramble+LPS, siRNA-CSE+LPS.
